# Supplementary material for: Orthorhombic KSc2F7:Yb/Er nanorods: controlled synthesis and strong red upconversion emission
Source: Royal Society of Chemistry journal article supplement (doi:10.1039/c3nr01840g), 2013-01-01
Supplement: c3nr01840g.pdf [file c3nr01840g.pdf]

## Supporting Information for

# Orthorhombic $\text{KSc}_2\text{F}_7$ :Yb/Er Nanorods: Controlled Synthesis and Strong Red Upconversion Emission

Yujie Ding,<sup>a</sup> Xue Teng,<sup>c</sup> Hao Zhu,<sup>a</sup> Lili Wang,<sup>c</sup> Wenbo Pei,<sup>b,c</sup> Jun-Jie Zhu,<sup>\*a</sup> Ling Huang<sup>\*b,c</sup>  
and Wei Huang<sup>\*b</sup>

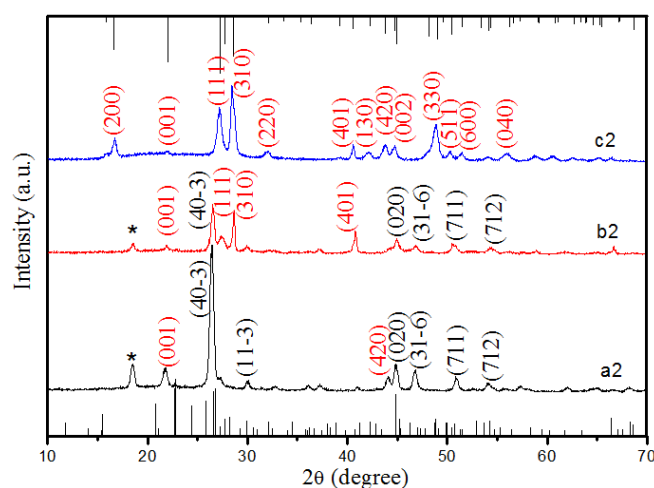

Figure S1 XRD patterns of  $\text{KScF}_x$  synthesized at (a2) 4.0, (b2) 2.8, and (c2) 1.6 mmol of  $\text{F}^-$  content, respectively. The straight line pattern below shows the standard pattern of monoclinic phase  $\text{KScF}_4$  (JCPDS card 48-0677), whose lattice planes are shown in black. The upside is orthorhombic phase  $\text{KSc}_2\text{F}_7$  (JCPDS card 77-1321), whose lattice planes are shown in red. The peaks marked with asterisks refer to unknown composition.

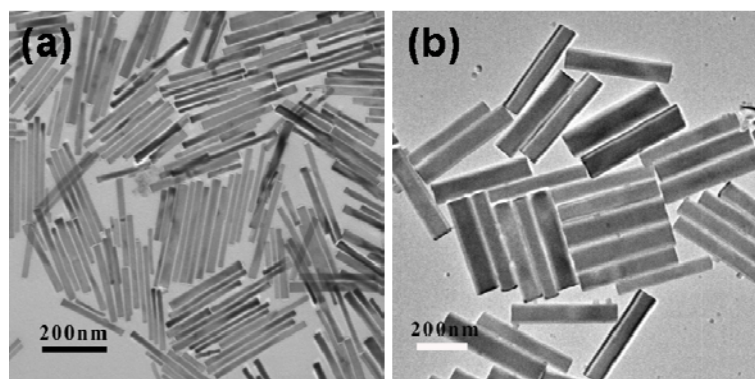

Figure S2 TEM images of KSc<sub>2</sub>F<sub>7</sub>:Yb/Er nanorods (a) and β-NaYF<sub>4</sub>:Yb/Er nanorods (b)
